# Supplementary material for: Loss of Primary Cilia Results in the Development of Cancer in the Murine Thyroid Gland
Source: PubMed Central journal article supplement — Mol Cells. 2019 Jan 2;42(2):113–22. doi: 10.14348/molcells.2018.0430 (PMC6399002; doi:10.14348/molcells.2018.0430), 2019-01-02
Supplement: molce-42-2-113-suppl.pdf [file molce-42-2-113-suppl.pdf]

## Loss of Primary Cilia Results in the Development of Cancer in the Murine Thyroid Gland

Junguee Lee<sup>1</sup>, Shinae Yi<sup>2</sup>, Joon Young Chang<sup>2</sup>, Jung Tae Kim<sup>2</sup>, Hae Joung Sul<sup>1</sup>, Ki Cheol Park<sup>3</sup>, Xuguang Zhu<sup>4</sup>, Sheue-yann Cheng<sup>4</sup>, Jukka Kero<sup>5</sup>, Joon Kim<sup>6</sup>, and Minho Shong<sup>2,\*</sup>

<sup>1</sup>Department of Pathology, Daejeon St. Mary's Hospital, College of Medicine, The Catholic University of Korea, Daejeon 34943, Korea, <sup>2</sup>Research Center for Endocrine and Metabolic Diseases, Division of Endocrinology, Department of Internal Medicine, Chungnam National University School of Medicine, Daejeon 35015, Korea, <sup>3</sup>Clinical Research Institute, Daejeon St. Mary's Hospital, College of Medicine, The Catholic University of Korea, Daejeon <sup>34943</sup>, Korea, <sup>4</sup>Laboratory of Molecular Biology, National Cancer Institute, MD 20892-4264, USA, <sup>5</sup>Research Centre for Integrative Physiology and Pharmacology, Institute of Biomedicine, University of Turku, 20520 Turku, Finland, <sup>6</sup>Graduate School of Medical Science and Engineering, Korea Advanced Institute of Science and Technology, Daejeon 34040, Korea

\*Correspondence: [minhos@cnu.ac.kr](mailto:minhos@cnu.ac.kr)

### SUPPLEMENTARY TABLES

**Supplementary Table 1. List of primers used for RT-qPCR analysis (mouse)**

| Gene           | Forward                           | Reverse                           |
|----------------|-----------------------------------|-----------------------------------|
| <i>Ift88</i>   | GAC CAC CTT TTT AGC CTC CTG       | AGG GAA GGG ACT TAG GAA TGA       |
| <i>Tpo</i>     | TGC CAC GAC CAA GTG ACA GCA       | AGA GAC GGA AAT CCA TCG CTC G     |
| <i>Tshr</i>    | GCG CTT TTA AGA ACC AGA AGA       | GGT TCC GGA TAC TGC TCT CA        |
| <i>Tg</i>      | AGT CCC TCA CAT CCT CAG GTT       | ATG CCA ACC TCA CAT TTC TTG       |
| <i>Nis</i>     | TAA TGC TCG TCG GCT TCT GGG TG    | AGA ACT GGG GAT CCC TCT GGA AGT G |
| <i>Pendrin</i> | GAC TGT AAA GAC CCT CTT GAT CTG A | GGA AGC AAG TCT ACG CAT GG        |
| <i>GAPDH</i>   | CGT CCC GTA GAC AAA ATG GT        | GAA TTT GCC GTG AGT GGA GT        |
